# Supplementary material for: A General Protein O-Glycosylation Gene Cluster Encodes the Species-Specific Glycan of the Oral Pathogen Tannerella forsythia: O-Glycan Biosynthesis and Immunological Implications
Source: PubMed Central journal article supplement (PMC6120980; doi:10.3389/fmicb.2018.02008), 2018-08-28
Supplement: Data_Sheet_1.pdf [file Data_Sheet_1.pdf]

## *Supplementary Material*

### **A General Protein *O*-Glycosylation Gene Cluster Encodes the Species-Specific Glycan of the Oral Pathogen *Tannerella forsythia*: Glycan Biosynthesis and Immunological Implications**

Markus B. Tomek, Daniel Maresch, Markus Windwarder, Valentin Friedrich, Bettina Janesch, Kristina Fuchs<sup>1</sup>, Laura Neumann, Irene Nimeth, Nikolaus F. Zwickl, Juliane C. Dohm, Arun Everest-Dass, Daniel Kolarich, Heinz Himmelbauer, Friedrich Altmann, and Christina Schäffer\*

\* **Correspondence:** Christina Schäffer, [christina.schaeffer@boku.ac.at](mailto:christina.schaeffer@boku.ac.at)

#### **Supplementary Data**

Supplementary Figures S1-S11

Supplementary Tables S1-S5

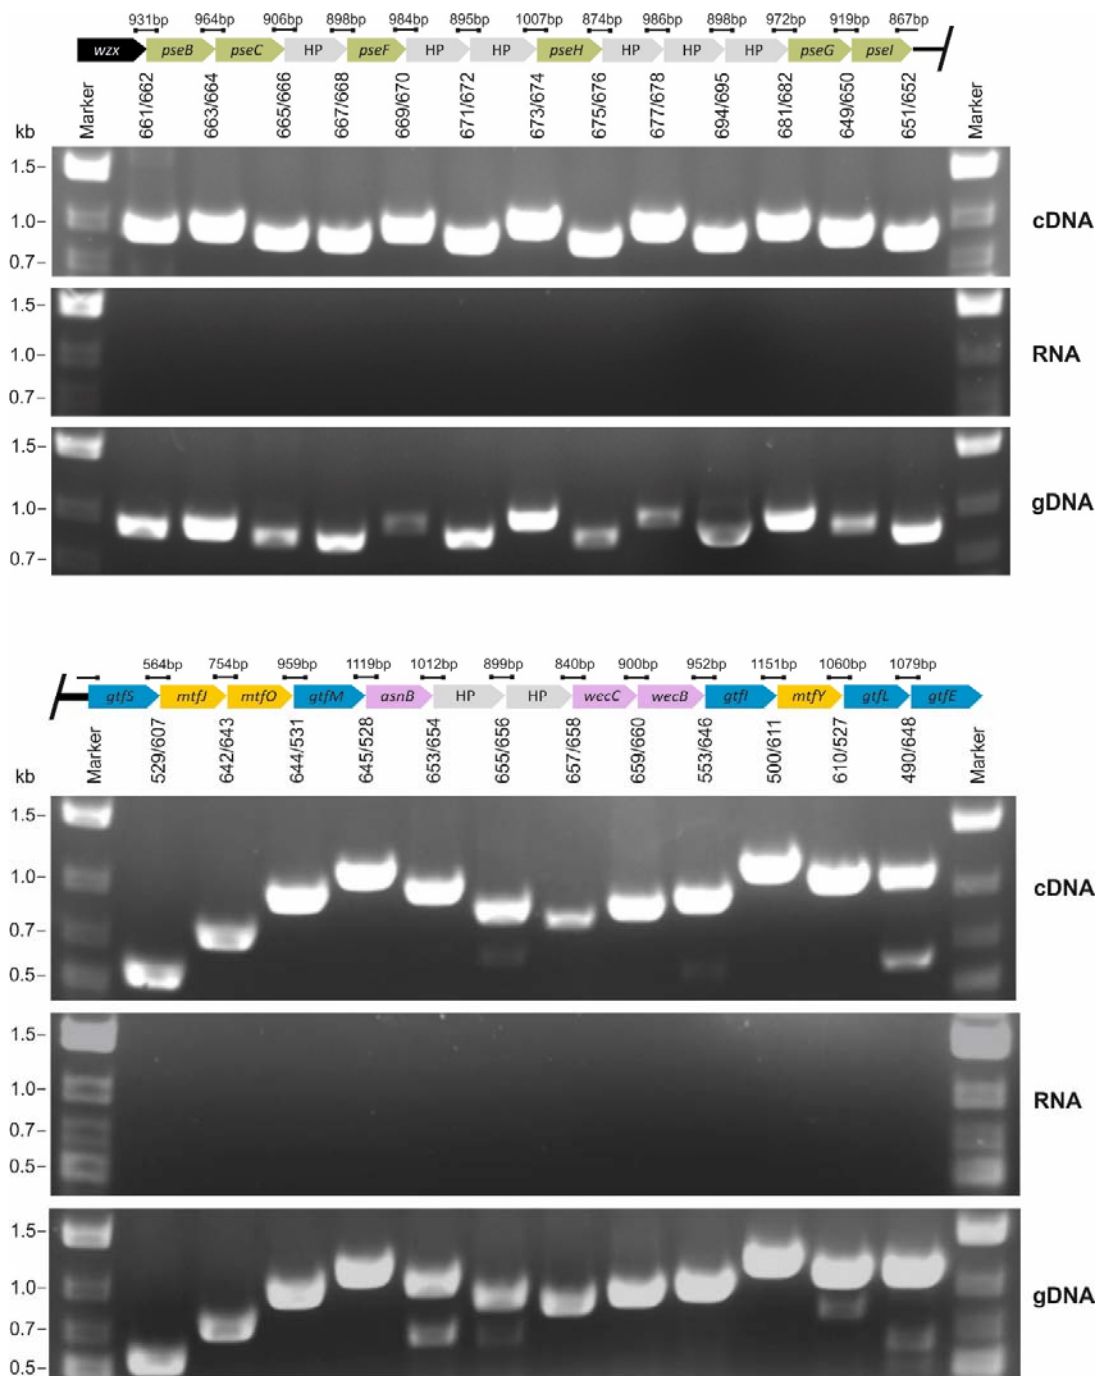

**Supplementary FIGURE S1 | Operon structure of the *T. forsythia* ATCC 43037 protein O-glycosylation gene cluster.** Agarose gel electrophoresis analyses of co-transcription of neighbouring genes as indicated, based on expected PCR fragment sizes upon PCR amplification from cDNA (upper panel), total RNA (middle panel; negative control) and genomic DNA (lower panel; positive control). Primers are listed in Supplementary Table S2. The presence of PCR fragments in the cDNA gels demonstrates co-transcription of all analysed genes, indicative of a polycistronic O-glycosylation gene cluster. O'Gene Ruler 1 kb Plus DNA Ladder (Thermo Fisher Scientific) was used as a gene ladder and is indicated on the first and last lane.

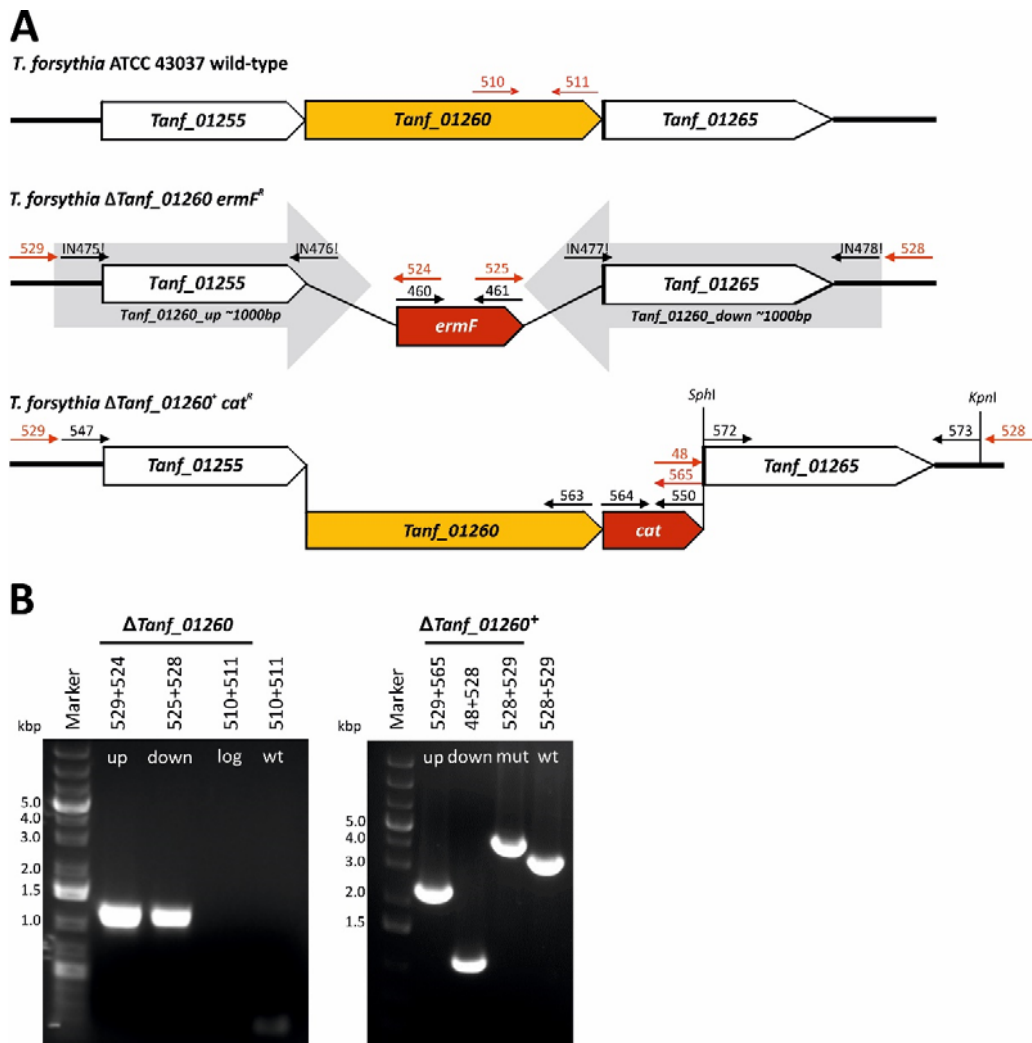

**Supplementary FIGURE S2 | Strategy for the generation of a *T. forsythia* ATCC 43037 mutant at the *Tanf\_01260* locus and confirmation by PCR. (A)** The genomic organization of the *Tanf\_01260* locus is shown for the parent strain *T. forsythia* ATCC 43037, the  $\Delta$ *Tanf\_01260* mutant and the reconstituted mutant  $\Delta$ *Tanf\_01260*<sup>+</sup>. Black coloured arrows represent primers used for PCR amplification of genes and homologous regions, red coloured primers represent those used to screen for correct integration of the knock-out and reconstitution cassettes; restriction sites used for cloning are indicated (not drawn to scale). **(B)** Agarose gel electrophoresis (left) confirms the deletion of *Tanf\_01260* using the upstream primers 529/524 (1099 bp) and downstream primers 525/528 (1089 bp) on genomic DNA of *T. forsythia* ATCC 43037  $\Delta$ *Tanf\_01260* mutant with integrated *ermF* cassette. Primers 510/511 yield in a 199-bp PCR fragment when using *T. forsythia* wild-type genomic DNA, whereas this fragment is absent on genomic DNA of the  $\Delta$ *Tanf\_01260* mutant confirming the loss of the gene (log). Agarose gel electrophoresis (right) confirmed the reconstitution of the deleted *Tanf\_01260* gene using upstream primers 529/565 (2247 bp) and downstream primers 48/528 (1095 bp). Screening primers 528/529 yield a 3937-bp PCR product on genomic DNA of the reconstituted mutant  $\Delta$ *Tanf\_01260*<sup>+</sup> (mut) with integrated *cat* resistance gene, whereas the same primer pair results in a 3280-bp product on genomic DNA of the *T. forsythia* wild-type. O'Gene Ruler 1 kb Plus DNA Ladder (Thermo Fisher Scientific) was used as a gene ladder.

**A**

*T. forsythia* ATCC 43037 wild-type

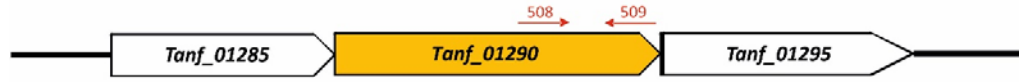

*T. forsythia*  $\Delta$ Tanf\_01290 *ermF*<sup>R</sup>

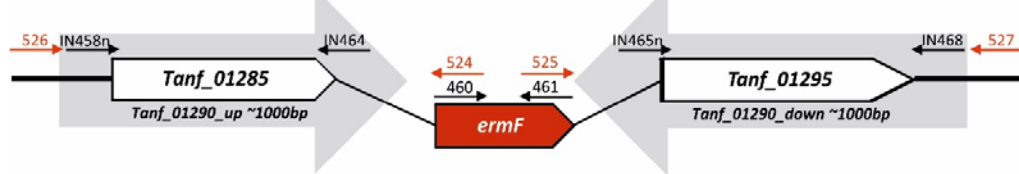

*T. forsythia*  $\Delta$ Tanf\_01290<sup>+</sup> *cat*<sup>R</sup>

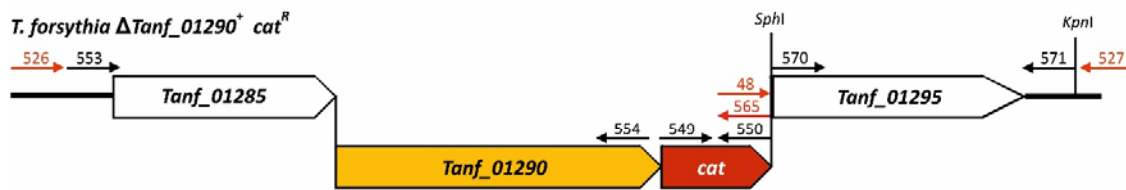

**B**

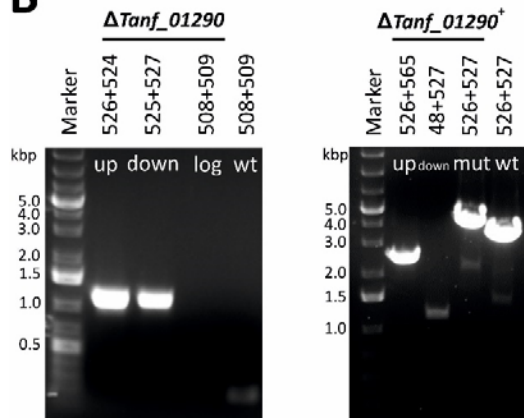

**Supplementary FIGURE S3 | Strategy for the generation of a *T. forsythia* ATCC 43037 mutant at the *Tanf\_01290* locus and confirmation by PCR. (A)** The genomic organization of the *Tanf\_01290* locus is shown for the parent strain *T. forsythia* ATCC 43037, the  $\Delta$ *Tanf\_01290* mutant and the reconstituted mutant  $\Delta$ *Tanf\_01290*<sup>+</sup>. Black coloured arrows represent primers used for PCR amplification of genes and homologous regions, red coloured primers represent those used to screen for correct integration of the knock-out and reconstitution cassettes; restriction sites used for cloning are indicated (not drawn to scale). **(B)** Agarose gel electrophoresis (left) confirms the deletion of *Tanf\_01290* using the upstream primers 526/524 (1150 bp) and downstream primers 525/527 (1159 bp) on genomic DNA of *T. forsythia* ATCC 43037  $\Delta$ *Tanf\_01290* mutant with integrated *ermF* cassette. Primers 508/509 yield in a 193-bp PCR fragment when using *T. forsythia* wild-type genomic DNA, whereas this fragment is absent on genomic DNA of the  $\Delta$ *Tanf\_01290* mutant confirming the loss of the gene (log). Agarose gel electrophoresis (right) confirms the reconstitution of the deleted *Tanf\_01290* gene using upstream primers 526/565 (2358 bp) and downstream primers 48/527 (1156 bp). Screening primers 526/527 yield a 4118-bp PCR product on genomic DNA of the reconstituted mutant  $\Delta$ *Tanf\_01290*<sup>+</sup> (mut) with integrated *cat* resistance gene, whereas the same primer pair results in a 3461-bp product on genomic DNA of the *T. forsythia* wild-type. O'Gene Ruler 1 kb Plus DNA Ladder (Thermo Fisher Scientific) was used as a gene ladder.

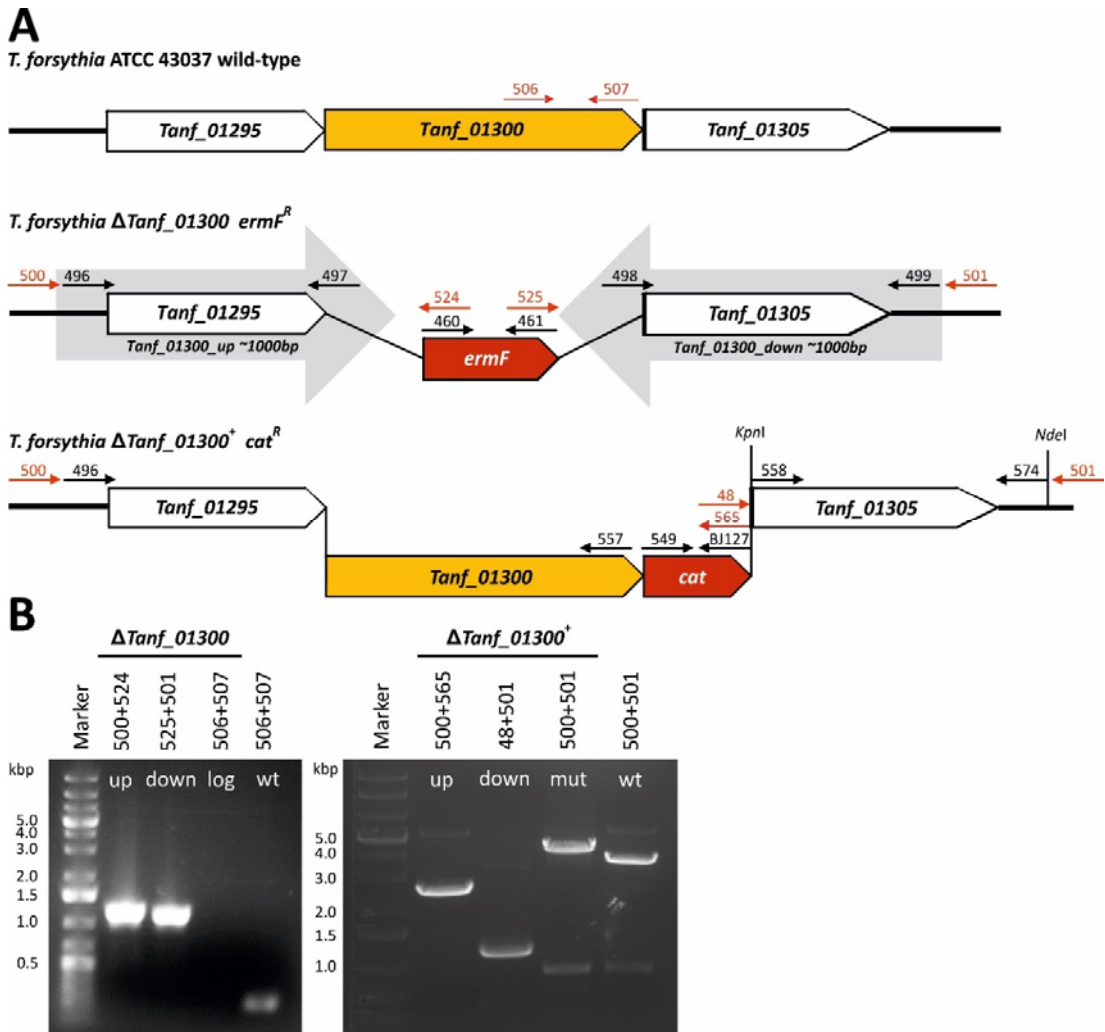

**Supplementary FIGURE S4 | Strategy for the generation of a *T. forsythia* ATCC 43037 mutant at the *Tanf\_01300* locus and confirmation by PCR. (A)** The genomic organization of the *Tanf\_01300* locus is shown for the parent strain *T. forsythia* ATCC 43037, the  $\Delta$ *Tanf\_01300* mutant and the reconstituted mutant  $\Delta$ *Tanf\_01300*<sup>+</sup>. Black coloured arrows represent primers used for PCR amplification of genes and homologous regions, red coloured primers represent those used to screen for correct integration of the knock-out and reconstitution cassettes; restriction sites used for cloning are indicated (not drawn to scale). **(B)** Agarose gel electrophoresis (left) confirms the deletion of *Tanf\_01300* using the upstream primers 500/524 (1184 bp) and downstream primers 525/501 (1137 bp) on genomic DNA of *T. forsythia* ATCC 43037  $\Delta$ *Tanf\_01300* mutant with integrated *ermF* cassette. Primers 506/507 yield a 224-bp PCR fragment when using *T. forsythia* wild-type genomic DNA, whereas this fragment is absent on genomic DNA of the  $\Delta$ *Tanf\_01300* mutant confirming the loss of the gene (log). Agarose gel electrophoresis (right) confirms the reconstitution of the deleted *Tanf\_01300* gene using upstream primers 500/565 (2446 bp) and downstream primers 48/501 (1143 bp). Screening primers 500/501 yield in a 4184-bp PCR product on genomic DNA of the reconstituted mutant  $\Delta$ *Tanf\_01300*<sup>+</sup> (mut) with integrated *cat* resistance gene, whereas the same primer pair results in a 3527-bp product on genomic DNA of the *T. forsythia* wild-type. O'Gene Ruler 1 kb Plus DNA Ladder (Thermo Fisher Scientific) was used as a gene ladder.

**A**

*T. forsythia* ATCC 43037 wild-type

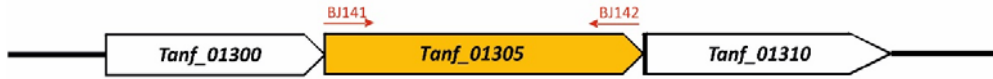

*T. forsythia*  $\Delta$ Tanf\_01305 *ermF<sup>R</sup>*

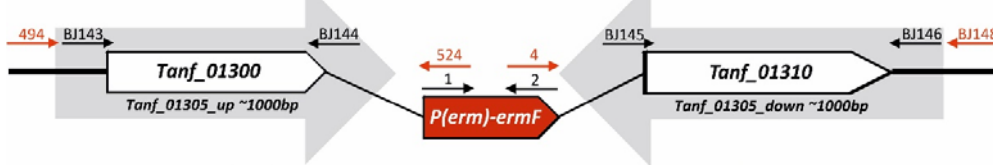

*T. forsythia*  $\Delta$ Tanf\_01305<sup>+</sup> *cat<sup>R</sup>*

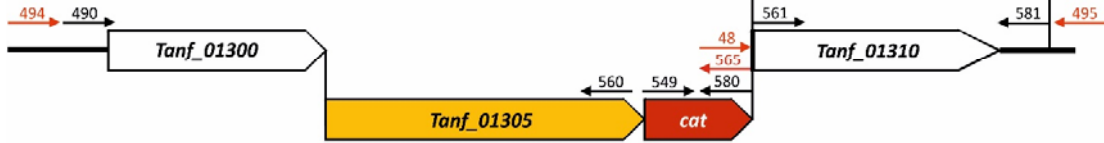

**B**

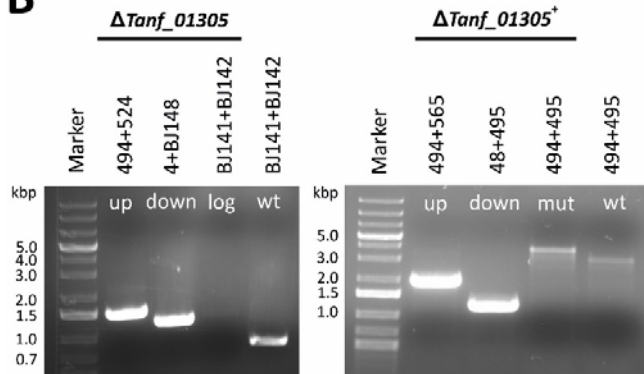

**Supplementary FIGURE S5 | Strategy for the generation of a *T. forsythia* ATCC 43037 mutant at the *Tanf\_01305* locus and confirmation by PCR. (A)** The genomic organization of the *Tanf\_01305* locus is shown for the parent strain *T. forsythia* ATCC 43037, the  $\Delta$ *Tanf\_01305* mutant and the reconstituted mutant  $\Delta$ *Tanf\_01305*<sup>+</sup>. Black coloured arrows represent primers used for PCR amplification of genes and homologous regions, red coloured primers represent those used to screen for correct integration of the knock-out and reconstitution cassettes; restriction sites used for cloning are indicated (not drawn to scale). **(B)** Agarose gel electrophoresis (left) confirms the deletion of *Tanf\_01305* using the upstream primers 494/524 (1432 bp) and downstream primers 4/BJ148 (1192 bp) on genomic DNA of *T. forsythia* ATCC 43037  $\Delta$ *Tanf\_01305* mutant with integrated (*Perm*)-*ermF* cassette. Primers BJ141/BJ142 yield a 768-bp PCR fragment when using *T. forsythia* wild-type genomic DNA, whereas this fragment is absent on genomic DNA of the  $\Delta$ *Tanf\_01305* mutant confirming the loss of the gene (log). Agarose gel electrophoresis (right) confirms the reconstitution of the deleted *Tanf\_01305* gene using upstream primers 494/565 (1799 bp) and downstream primers 48/495 (1179 bp). Screening primers 494/495 yield in a 3680-bp PCR product on genomic DNA of the reconstituted mutant  $\Delta$ *Tanf\_01305*<sup>+</sup> (mut) with integrated *cat* resistance gene, whereas the same primer pair results in a 3023-bp product on genomic DNA of the *T. forsythia* wild-type. O’Gene Ruler 1 kb Plus DNA Ladder (Thermo Fisher Scientific) was used as a gene ladder.



**A**

*T. forsythia* ATCC 43037 wild-type

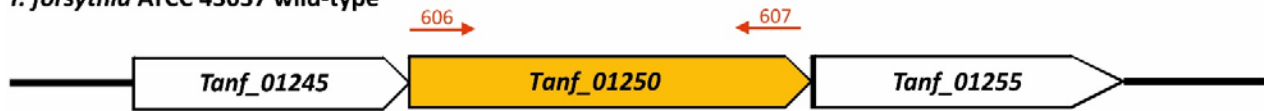

*T. forsythia*  $\Delta$ Tanf\_01250 *ermF*<sup>R</sup>

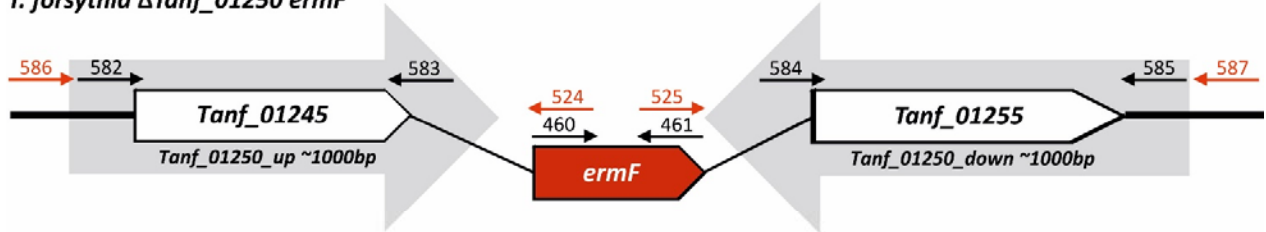

**B**

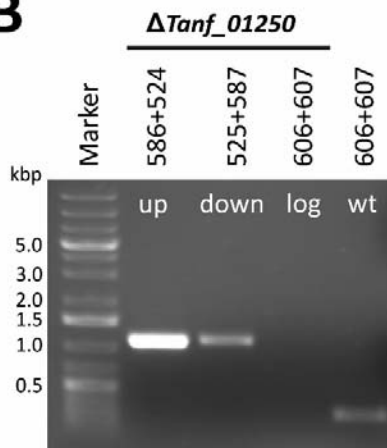

**Supplementary FIGURE S6 | Strategy for the generation of a *T. forsythia* ATCC 43037 mutant at the *Tanf\_01250* locus and confirmation by PCR.** (A) The genomic organization of the *Tanf\_01250* locus is shown for the parent strain *T. forsythia* ATCC 43037 and the  $\Delta$ *Tanf\_01250* mutant. Black coloured arrows represent primers used for PCR amplification of genes and homologous regions, red coloured primers represent those used to screen for correct integration of the knock-out and reconstitution cassettes; (not drawn to scale). (B) Agarose gel electrophoresis confirms the deletion of *Tanf\_01250* using the upstream primers 586/524 (1108 bp) and downstream primers 525/587 (1122 bp) on genomic DNA of *T. forsythia* ATCC 43037  $\Delta$ *Tanf\_01250* mutant with integrated *ermF* cassette. Primers 606/607 yield in a 273-bp PCR fragment when using *T. forsythia* wild-type genomic DNA (wt), whereas this fragment is absent on genomic DNA of the  $\Delta$ *Tanf\_01250* mutant confirming the loss of the gene (log). O'Gene Ruler 1 kb Plus DNA Ladder (Thermo Fisher Scientific) was used as a gene ladder.

**A**

*T. forsythia* ATCC 43037 wild-type

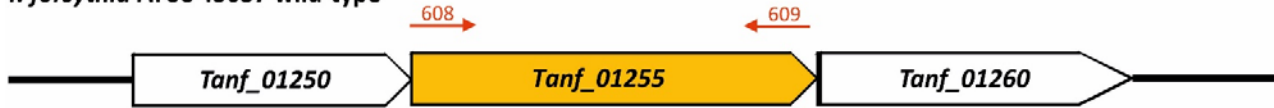

*T. forsythia*  $\Delta$ Tanf\_01255 *ermF*<sup>r</sup>

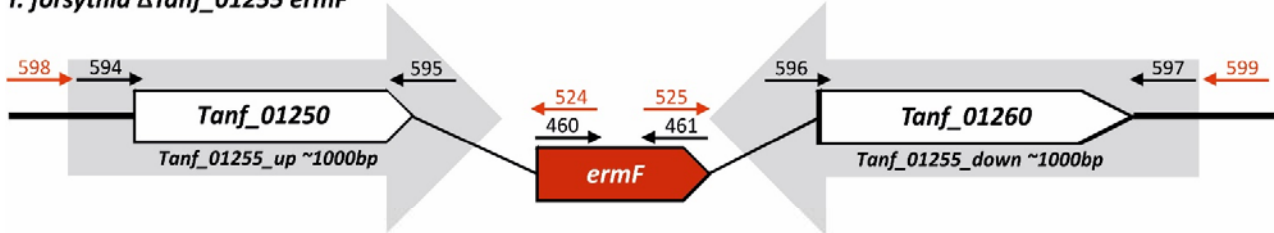

**B**

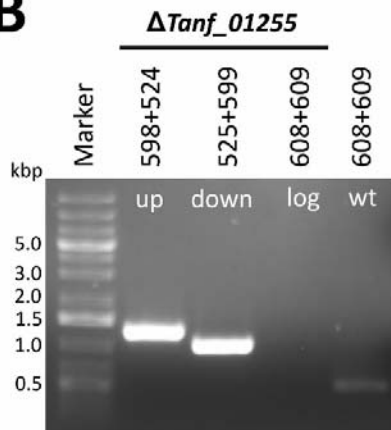

**Supplementary FIGURE S7 | Strategy for the generation of a *T. forsythia* ATCC 43037 mutant at the *Tanf\_01255* locus and confirmation by PCR. (A)** The genomic organization of the *Tanf\_01255* locus is shown for the parent strain *T. forsythia* ATCC 43037 and the  $\Delta$ *Tanf\_01255* mutant. Black coloured arrows represent primers used for PCR amplification of genes and homologous regions, red coloured primers represent those used to screen for correct integration of the knock-out and reconstitution cassettes; (not drawn to scale). **(B)** Agarose gel electrophoresis confirms the deletion of *Tanf\_01255* using the upstream primers 598/524 (1234 bp) and downstream primers 525/599 (1029 bp) on genomic DNA of *T. forsythia* ATCC 43037  $\Delta$ *Tanf\_01255* mutant with integrated *ermF* cassette. Primers 608/609 yield in a 504-bp PCR fragment when using *T. forsythia* wild-type genomic DNA (wt), whereas this fragment is absent on genomic DNA of the  $\Delta$ *Tanf\_01255* mutant confirming the loss of the gene (log). O'Gene Ruler 1 kb Plus DNA Ladder (Thermo Fisher Scientific) was used as a gene ladder.



**A**

*T. forsythia* ATCC 43037 wild-type

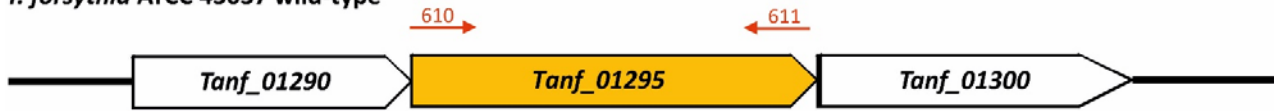

*T. forsythia*  $\Delta$ Tanf\_01295 *ermF*<sup>R</sup>

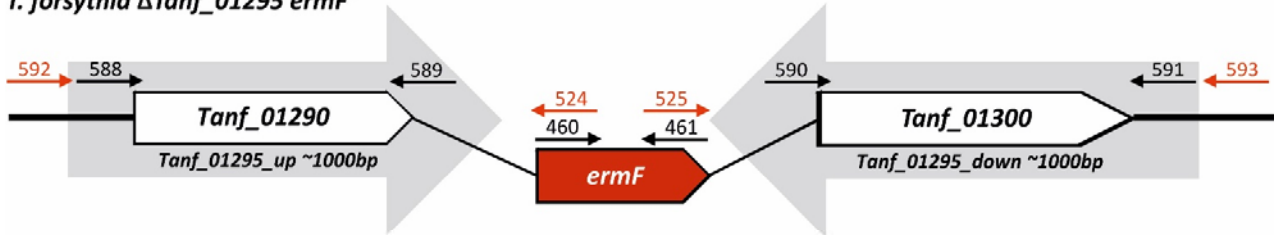

**B**

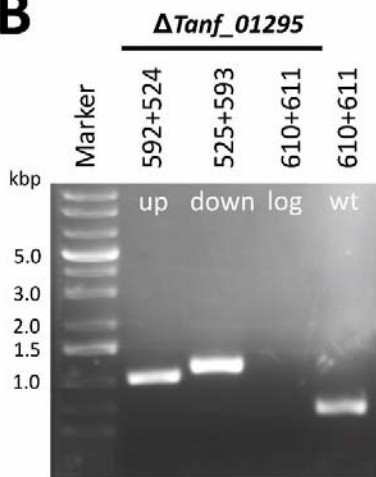

**Supplementary FIGURE S8 | Strategy for the generation of a *T. forsythia* ATCC 43037 mutant at the *Tanf\_01295* locus and confirmation by PCR. (A)** The genomic organization of the *Tanf\_01295* locus is shown for the parent strain *T. forsythia* ATCC 43037 and the  $\Delta$ *Tanf\_01295* mutant. Black coloured arrows represent primers used for PCR amplification of genes and homologous regions, red coloured primers represent those used to screen for correct integration of the knock-out and reconstitution cassettes; (not drawn to scale). **(B)** Agarose gel electrophoresis confirms the deletion of *Tanf\_01295* using the upstream primers 592/524 (1023 bp) and downstream primers 525/593 (1172 bp) on genomic DNA of *T. forsythia* ATCC 43037  $\Delta$ *Tanf\_01295* mutant with integrated *ermF* cassette. Primers 610/611 yield in a 642-bp PCR fragment when using *T. forsythia* wild-type genomic DNA (wt), whereas this fragment is absent on genomic DNA of the  $\Delta$ *Tanf\_01295* mutant confirming the loss of the gene (log). O'Gene Ruler 1 kb Plus DNA Ladder (Thermo Fisher Scientific) was used as a gene ladder.

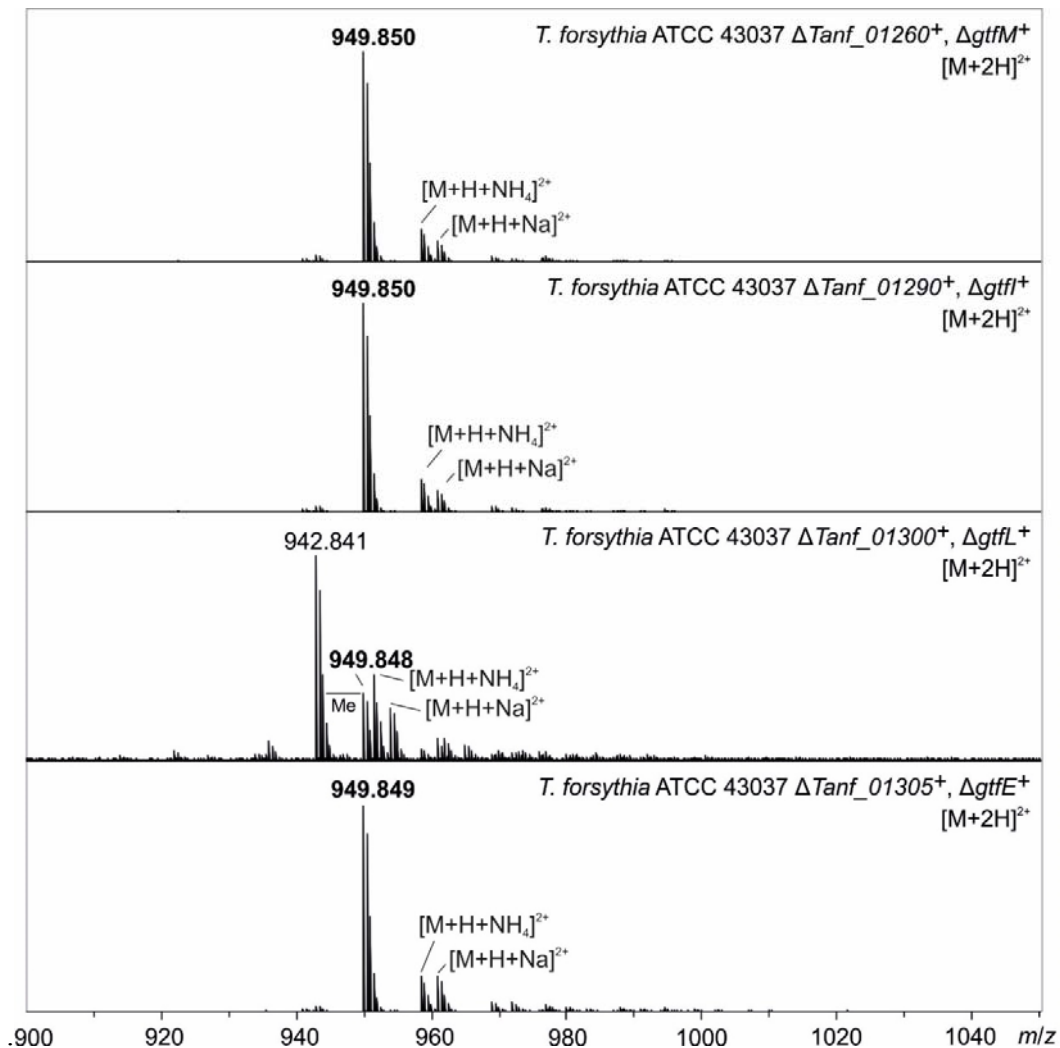

**Supplementary FIGURE S9 | Deconvoluted Q-TOF-MS sum spectra of  $\beta$ -eliminated TfsB O-glycans from complemented *T. forsythia* ATCC 43037 glycosyltransferase-deficient strains (*T. forsythia*  $\Delta$ gtfM<sup>+</sup>, *T. forsythia*  $\Delta$ gtfI<sup>+</sup>, *T. forsythia*  $\Delta$ gtfL<sup>+</sup>, and *T. forsythia*  $\Delta$ gtfE<sup>+</sup>).** All samples were measured in positive mode with a quadrupole time-of-flight (Q-TOF) instrument (maXis 4G; Bruker, Bremen, Germany). Standard source settings (capillary voltage 4.5 kV, nebulizer gas pressure 0.5 bar, drying gas 5 l/min, 200°C) were used (Grünwald-Gruber et al., 2017). Instrument tuning was optimized for a mid-mass range (500–3000-Da molecules). The purified samples were loaded on a PGC column (100 mm x 0.32 mm, 5  $\mu$ m; Thermo Scientific, Waltham, MA) with use of 65 mM ammonium formate buffer, pH 3.0, as the aqueous solvent (A). A gradient from 1% solvent B (80% acetonitrile plus 20% solvent A) to 68% solvent B in 40 min was applied, at a flow rate of 6  $\mu$ l/min. Detection was performed in data-dependent acquisition mode (switching to MS/MS mode for eluted peaks), directly linked to a Thermo Ultimate 3000 UPLC system. MS scans were recorded (range 150–2200  $m/z$ ) and the four highest peaks were selected for fragmentation. Instrument calibration was performed with an ESI calibration mixture (Agilent). Data interpretation was done with DataAnalysis 4.0 (Bruker). Relative peak intensities of occurring peaks are given on the y axis. Data for *T. forsythia*  $\Delta$ gtfS<sup>+</sup> can be found elsewhere (Tomek et al., 2017).

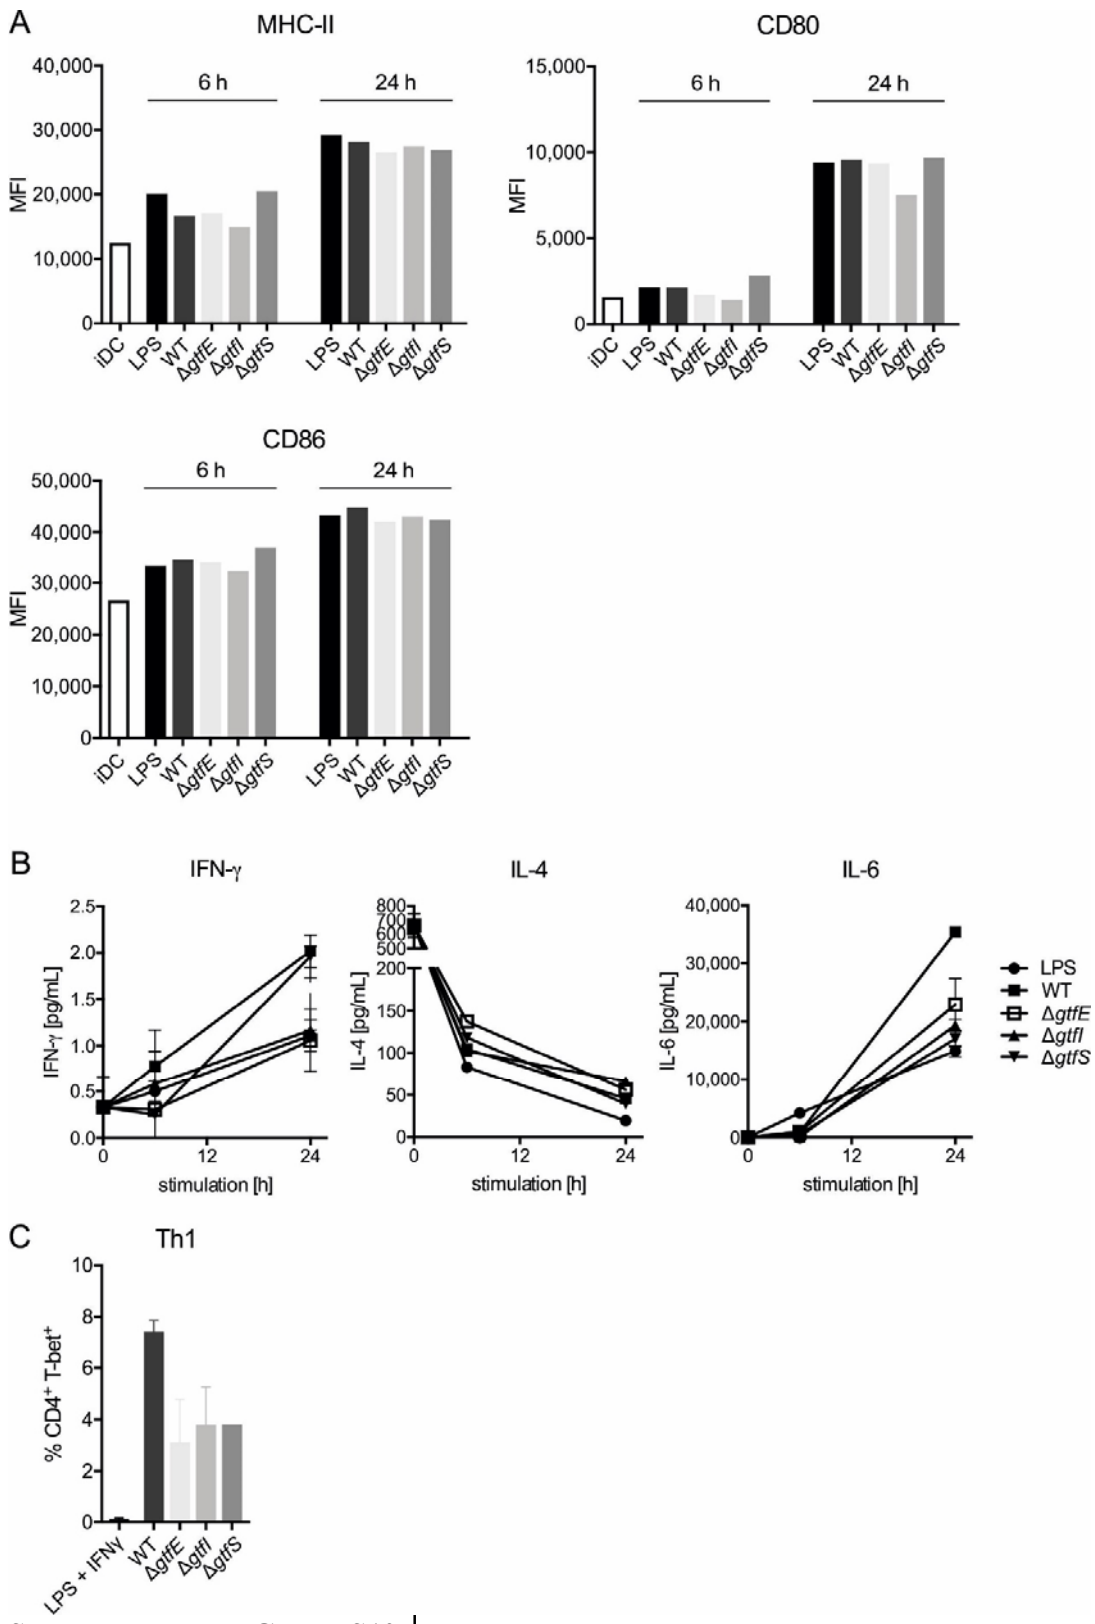

Supplementary FIGURE S10 |

**Supplementary FIGURE S10 | Effects of *T. forsythia* protein glycosylation on human DC phenotype and functionality.** (A) Surface expression of DC activation markers upon stimulation by *T. forsythia* wild-type (WT) and glycosyltransferase-deficient strains as compared to LPS and measured by flow cytometry. (iDCs, immature = unstimulated DCs) (B) Secretion of inflammatory cytokines by human DCs upon stimulation by *T. forsythia* wild-type and glycosyltransferase-deficient strains as measured in culture supernatants by ProcartaPlex Multiplex Immunoassay (n=3). (C) T cell-priming upon antigen-presenting cell (APC) stimulation with *T. forsythia* wild-type and glycosyltransferase-deficient strains was assessed by culturing human peripheral blood mononuclear cells (PBMCs). Th1 differentiation was assessed by expression of the signature transcription factor T-bet as measured by flow cytometry (n=3). All data are presented as mean  $\pm$ SEM.

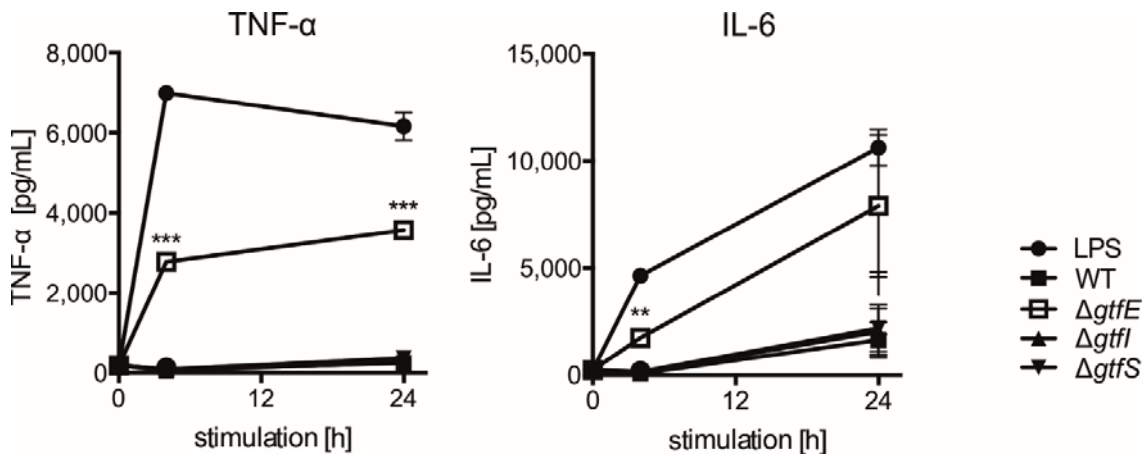

**Supplementary FIGURE S11 | Secretion of inflammatory cytokines TNF- $\alpha$  and IL-6 by murine DCs upon stimulation with *T. forsythia* ATCC 43037 wild-type (WT) and glycosyltransferase-deficient mutants (*T. forsythia*  $\Delta gtfE$ ,  $\Delta gtfI$ , and  $\Delta gtfS$ ) as measured in culture supernatants by ELISA. All data are presented as mean  $\pm$  SEM of triplicate determinations. One representative out of three independent experiments is shown. Statistically significant differences are indicated as \*\* $p < 0.01$  and \*\*\* $p < 0.001$  (unpaired Student's t-test). LPS, *E. coli* O111:B4 LPS.**

**Supplementary TABLE S1** | *Tannerella* strains used for genome sequence comparisons.

| <b>Strain/Species</b>          | <b>Accession</b>  | <b>Annotation date / source</b> |
|--------------------------------|-------------------|---------------------------------|
| <i>T. forsythia</i> FDC 92A2   | NC_016610.1       | 18-08-2015 / RefSeq             |
| <i>T. forsythia</i> ATCC 43037 | NZ_JUET00000000.1 | 18-08-2015 / RefSeq             |
| <i>T. forsythia</i> KS16       | NZ_AP013045.1     | 04-02-2016 / RefSeq             |
| <i>T. forsythia</i> 3313       | NZ_AP013044.1     | 04-02-2016 / RefSeq             |
| <i>T. forsythia</i> UB4        | FMMN01000000.1    | 01-10-2016 / GenBank            |
| <i>T. forsythia</i> UB20       | FMMM01000000.1    | 01-10-2016 / GenBank            |
| <i>T. forsythia</i> UB22       | FMML01000000.1    | 01-10-2016 / GenBank            |
| <i>Tannerella</i> sp. HOT-286  | NZ_CP017038.1     | 04-10-2016 / RefSeq             |



**Supplementary TABLE S2** | Oligonucleotide primers used for PCR amplification reactions.

| <b>Primers</b> | <b>Sequence (5'-3')</b>         |
|----------------|---------------------------------|
| 490            | GGGATATCGTATTGACCGGCATCCTC      |
| 500            | GGAGATGGCCCTGAAAGACAAACACTG     |
| 527            | TGCCCACTGGTCATGCATCG            |
| 528            | AATCTTTCAGGAAATCCGTAGGATTTGGATA |
| 529            | ATGTCAGAGCCGGAAATGAAATTATCCGTG  |
| 531            | GTAATAACCATATCTGCCTCTGGAAC      |
| 553            | ATCTTAACCCGGACCCAACCGGATG       |
| 607            | TCATGAATAGTCATCCATTTTAC         |
| 610            | ATGTTTTTTGACCGTTTTCTTCCCAAAG    |
| 611            | TTATTTTCTCGCTGCAATCACAATATAG    |
| 642            | ATGGATATAGGGCAAATAAGAAA         |
| 644            | AAGTAATAGAACACGTACATAATG        |
| 645            | ATGGGCATTTGATGTCAACTTIG         |
| 646            | AAGACGGAATGGTTACATTTAC          |
| 648            | CCGCAACGCTTCGCAACGTC            |
| 649            | TAAAAATCTGGGAAATACAAG           |
| 650            | AATAGCAGAGATAGACCCTAATG         |
| 651            | AATGCGGTTGGACTTAGATTAC          |
| 652            | CTCAATAACGGTCGTAGATTG           |
| 653            | AATTAGTGCAGCAGGGACAG            |
| 653            | AATTAGTGCAGCAGGGACAG            |
| 654            | GGCCCGTTTGTATTTATCTC            |
| 655            | AAGGGGTGCTGATGCGTGTAGG          |
| 656            | GCTGCTTCGGTATTCACCGGGAAG        |
| 657            | AGGTAAAGATGCCGACAGAG            |
| 658            | TAAATGGCTCCTTCCAATTCC           |
| 659            | GTCCGGCAAAGTATATTACCC           |
| 660            | CCCGGTGATAAGCACAAG              |
| 661            | ACATATTATTCTCTGCTAAG            |
| 662            | CGTCTGTGATAGTAATCATTTC          |
| 663            | GGCGGAATACATAAAGCATC            |
| 664            | GTCGCCTGCGAATTATACCC            |
| 665            | ATATGTTATTCAGGTAGAAG            |
| 666            | CAGATAAGGAGCAAATTGTC            |
| 667            | GACAAGCAATCCGCTCATAG            |
| 668            | CCTTCATTGCGTCTGTATTG            |
| 669            | TAATCAATACAGACGCAATG            |
| 670            | TGCAGCGGTCGGACCAATTC            |
| 671            | GCGGTAGTCGGTAAACGTC             |
| 672            | CAGTTACCGAATAGTTTACTG           |
| 673            | AGATTCTACCTCCAAAGAAG            |
| 674            | CCGCCTGTTTATTTGATTTCG           |
| 675            | TAGAGATTTCATCCTTAATAG           |
| 676            | CAATCGCCTCTACGGGCTTG            |
| 677            | ATTATTCAAGCCCGTAGAGG            |
| 678            | TACTGTCTGTACTGATATTC            |
| 681            | GACAGATGAAACTGCACAAAG           |
| 682            | TGCAATTACGGGACATTTAC            |
| 694            | ATCCTGCAGAACGTGCATTG            |
| 695            | TATTTCTTCCGGTTCAAATG            |

**Supplementary TABLE S3** | Amplification (black) and screening (red) oligonucleotide primers used for PCR reactions to generate *T. forsythia* ATCC 43037 glycosyltransferase knock-out mutants. Nucleotides used for OE-PCRs are written in bold, artificial restriction sites are underscored. Lowercase letters indicate artificially introduced bases for restriction endonuclease digestion.

| Primers                                                                               | Sequence (5'-3')                                                               |
|---------------------------------------------------------------------------------------|--------------------------------------------------------------------------------|
| <b>Amplification and screening primers for mutants at the <i>Tanf_01260</i> locus</b> |                                                                                |
| IN475 <sup>a</sup>                                                                    | GATTTGAGAAAGATTAAATGGAAACAATATTTG                                              |
| IN476 <sup>a</sup>                                                                    | <b>GTAAAACGAACGGGCAATTTCTTTTTGTCATTTTAACTATTTTATTCAATCATAGTTTTCGATAC</b>       |
| IN477 <sup>a</sup>                                                                    | <b>GTTGTCCCTGAAAAATTCATCCTTCGTAGTAATAAGATGTGTGGAATAACAGGGTATATCTC</b>          |
| IN478 <sup>a</sup>                                                                    | TGGGCATTCAAATTATAATATTGCACAC                                                   |
| 460 <sup>b</sup>                                                                      | ATGACAAAAAAGAAATTGCCCGTTCGTTTTAC                                               |
| 461 <sup>b</sup>                                                                      | CTACGAAGGATGAAATTTTTCAGGGACAAC                                                 |
| 547                                                                                   | AAAGAGGATCTACGAACAATAAC                                                        |
| 550                                                                                   | <u>gactGGTACC GCATGCTTATAAAAGCCAGTCATTAGG</u>                                  |
| 563                                                                                   | <b>TCCAATTGTCTAAATCAATTTTATTAAGTTCATTGTACATTATAATTCTTTTATCCATTCTAATACATTTG</b> |
| 564                                                                                   | <b>GAATGGATAAAAGAATTATAATGTACAATGAACTTTAATAAAAATTGATTTAGACAATTG</b>            |
| 572                                                                                   | <u>gctaGCATGCTAAGATGTGTGGAATAACAGGGTATATC</u>                                  |
| 573                                                                                   | <u>gctaGGTACCCCTCCACTAAGCAAGGCTCCAAC</u>                                       |
| 48 <sup>c</sup>                                                                       | GTCAGATAGGCTAATGACTGGC                                                         |
| 510                                                                                   | GGGCGCTTGTGTTCTTCC                                                             |
| 511                                                                                   | TCTTCGCATAGTATCAAGAG                                                           |
| 524 <sup>b</sup>                                                                      | GTAAAACGAACGGGCAATTTCTTTTTGTCAT                                                |
| 525 <sup>b</sup>                                                                      | CCCTGAAAAATTCATCCTTCGTAG                                                       |
| 528                                                                                   | AATCTTTCAGGAAATCCGTAGGATTTGGATA                                                |
| 529                                                                                   | ATGTCAGAGCCGGAAATGAAATTATCCGTG                                                 |
| 565 <sup>b</sup>                                                                      | CTAAATCAATTTTATTAAGTTCAT                                                       |
| <b>Amplification and screening primers for mutants at the <i>Tanf_01290</i> locus</b> |                                                                                |
| 460 <sup>b</sup>                                                                      | ATGACAAAAAAGAAATTGCCCGTTCGTTTTAC                                               |
| 461 <sup>b</sup>                                                                      | CTACGAAGGATGAAATTTTTCAGGGACAAC                                                 |
| 549                                                                                   | ATGAACTTTAATAAAAATTGATTTAG                                                     |
| 550                                                                                   | <u>gactGGTACC GCATGCTTATAAAAGCCAGTCATTAGG</u>                                  |
| 553                                                                                   | ATCTTAACCCGGACCCAACCGGATG                                                      |
| 554                                                                                   | <b>TAAATCAATTTTATTAAGTTCATTGTACATCATTGTTGTTACTTATTAC</b>                       |
| 570                                                                                   | <u>gctaGCATGCATAACAATCTGACCGATCGCTC</u>                                        |

571 *gcta***GGTACCCGAACCACTTAGGCTGTTTCTC**  
 IN458n TGCTAAACATTTTCGGGATTGTTCCGAACTACG  
 IN464 **GTA AACGAACGGGCAATTTCTTTTTTGTCATCTTTTAAGAAAGCTGAAAAGAGTTAACAATC**  
 IN465n **GTTGTCCCTGAAAAATTCATCCTTCGTAGATAACAATCTGACCGATCGCTCTT**  
 IN468 TGAGCAGGAGTATCTTCATCTTATTTTCTCGC  
 48<sup>c</sup> GTCAGATAGGCCTAATGACTGGC  
 508 TCTCGATTAACGACGCGATG  
 509 TATGAAGCCTCTCCATAAC  
 524<sup>b</sup> GTA AACGAACGGGCAATTTCTTTTTTGTCAT  
 525<sup>b</sup> CCCTGAAAAATTCATCCTTCGTAG  
 526 TCAAGATGGCTCCGCTTGTG  
 527 TGCCCACTGGTCATGCATCG  
 565<sup>b</sup> CTAAATCAATTTTATTAAGTTCAT

#### **Amplification and screening primers for mutants at the *Tanf\_01300* locus**

460<sup>b</sup> ATGACAAAAAGAAATTGCCCGTTCGTTTTAC  
 461<sup>b</sup> CTACGAAGGATGAAATTTTCAGGGACAAC  
 496 CGATTAACGACGCGATGTGTTTCTC  
 497 **GTA AACGAACGGGCAATTTCTTTTTTGTCATCTTATTTTCTCGCTGCAATCACAATATAG**  
 498 **GCTGGAAGTTGTCCCTGAAAAATTCATCCTTCGTAGTATATGTCTCCTCTGTTTTCCATTATC**  
 499 CGTGCTCTCCCGTTTCTTTATAGTAATC  
 549 ATGAACTTTAATAAAAATTGATTTAG  
 557 **CTAAATCAATTTTATTAAGTTCATTGTACATTATGACAATAGACTGTGATATAATG**  
 558 *gcat***GGTACCTATATGTCTCCTCTGTTTTCCATTATC**  
 574 *gcta***CATATGCGTGCTCTCCCGTTTCTTTATAGTAATC**  
 BJ127 *aatca***CATATG GGTACCTTATAAAAAGCCAGTCATTAGGCCTATCTGAC**  
 48<sup>c</sup> GTCAGATAGGCCTAATGACTGGC  
 500 GGAGATGGCCCTGAAAGACAAACTG  
 501 CCGGAAAGGAAGTAGAGCGAGAACAC  
 506 GCAGCCTTATTGCCTTATCC  
 507 TCTGCCACATACCCGTTCTG  
 524<sup>b</sup> GTA AACGAACGGGCAATTTCTTTTTTGTCAT  
 525<sup>b</sup> CCCTGAAAAATTCATCCTTCGTAG  
 565<sup>b</sup> CTAAATCAATTTTATTAAGTTCAT

### Amplification and screening primers for mutants at the *Tanf\_01305* locus

|                  |                                                                       |
|------------------|-----------------------------------------------------------------------|
| 1 <sup>c</sup>   | GGTACCCCCGATAGCTTCCGCTATTGC                                           |
| 2 <sup>c</sup>   | CTACGAAGGATGAAATTTTTCAGGG                                             |
| 490              | GGGATATCGTATTGACCGGCATCCTC                                            |
| 549              | ATGAACTTTAATAAAAATTGATTTAG                                            |
| 560              | <b>GTCTAAATCAATTTTATTAAAGTTCATTGTACACTAATAATTGTTCCCGAAAAGCTTCG</b>    |
| 561              | gtcaGGTACCTGAATCGACATTATAATGTAAGAATTG                                 |
| 580              | aatcaGGATCC GGTACCTTATAAAAAGCCAGTCATTAGGCCTATCTGAC                    |
| 581              | gatacGGATCCATCGTAATGCGAGCTGGCTCCGTAG                                  |
| BJ143            | GGATATCGTATTGACCGGCATCCTCTC                                           |
| BJ144            | <b>GCAATAGCGGAAGCTATCGGGGTACCATATTATGACAATAGACTGTGATATAATG</b>        |
| BJ145            | <b>CCCTGAAAAATTTTCATCCTTCGTAGTGAATCGACATTATAATGTAAGAATTGAAAAGATAG</b> |
| BJ146            | CTGTCCGTTACGGCTGAAGAAATGG                                             |
| 4 <sup>c</sup>   | CCCTGAAAAATTTTCATCCTTCGTAG                                            |
| 48 <sup>c</sup>  | GTCAGATAGGCCTAATGACTGGC                                               |
| 494              | CAGCCTAAGTGGTTCGGCAAGTTC                                              |
| 495              | CATCGTTCGGGCCCTTGCACGATAAGC                                           |
| 524 <sup>b</sup> | GTAACACGAACGGGCAATTTCTTTTTTGTGCAT                                     |
| 565 <sup>b</sup> | CTAAATCAATTTTATTAAAGTTCAT                                             |
| BJ141            | ATGTCTCCTCTGTTTTCCATTATCACC                                           |
| BJ142            | CTAATAATTGTTCCCGAAAAGCTTCGCC                                          |
| BJ148            | CACGGCAAGCAACCACCATCGTTC                                              |

---

<sup>a</sup> Sequence (3'-5'); <sup>b</sup> (Tomek et al., 2017); <sup>c</sup> (Friedrich et al., 2017)

**Supplementary TABLE S4** | Amplification (black) and screening (red) oligonucleotide primers used for PCR reactions to generate methyltransferase knock-out mutants. Nucleotides used for OE-PCRs are written in bold.

| Primers                                                                                | Sequence (5'-3')                                                  |
|----------------------------------------------------------------------------------------|-------------------------------------------------------------------|
| <b>Amplification and screening primers for a mutant at the <i>Tanf_01250</i> locus</b> |                                                                   |
| 582                                                                                    | GACTGTAGATGCGTATCCACAATTTC                                        |
| 583                                                                                    | <b>AAACGAACGGGCAATTTCTTTTTGTCATTGTACCTCTATACTTATATTACTGTTATTG</b> |
| 584                                                                                    | <b>TGTCCTGAAAAATTTTCATCCTTCGTAGATTTTCATTTCTGAATTAAGTAC</b>        |
| 585                                                                                    | ATAACCATATCTGCCTCTGGAAC                                           |
| 460 <sup>a</sup>                                                                       | ATGACAAAAAAGAAATTGCCCGTTCGTTTTAC                                  |
| 461 <sup>a</sup>                                                                       | CTACGAAGGATGAAATTTTTCAGGGACAAC                                    |
| 586                                                                                    | CGAGACCCTACCTGAATTTGTATG                                          |
| 587                                                                                    | TGGTATCTTCTTTGTATAAC                                              |
| 524 <sup>a</sup>                                                                       | GTA AACGAACGGGCAATTTCTTTTTGTCAT                                   |
| 525 <sup>a</sup>                                                                       | CCCTGAAAAATTTTCATCCTTCGTAG                                        |
| 606                                                                                    | ATGGATATAGGGCAAATAAG                                              |
| 607                                                                                    | TCATGAATAGTCATCCATTTTAC                                           |
| <b>Amplification and screening primers for a mutant at the <i>Tanf_01255</i> locus</b> |                                                                   |
| 594                                                                                    | CTGTCGCATTCCCTGGAGATACAAG                                         |
| 595                                                                                    | <b>CGGGCAATTTCTTTTTGTCATCCATTTTACCCCCCCTGAAAAC</b>                |
| 596                                                                                    | <b>GTCCCTGAAAAATTTTCATCCTTCGTAGATAAAATAGTTAAATGAGGAAAATC</b>      |
| 597                                                                                    | CATCACCTAATGGTATAGAAGCTAAC                                        |
| 460 <sup>a</sup>                                                                       | ATGACAAAAAAGAAATTGCCCGTTCGTTTTAC                                  |
| 461 <sup>a</sup>                                                                       | CTACGAAGGATGAAATTTTTCAGGGACAAC                                    |
| 598                                                                                    | GACTGTAGATGCGTATCCACAATTTC                                        |
| 599                                                                                    | CAGCTCTCCATAGTTATTCTC                                             |
| 524 <sup>a</sup>                                                                       | GTA AACGAACGGGCAATTTCTTTTTGTCAT                                   |
| 525 <sup>a</sup>                                                                       | CCCTGAAAAATTTTCATCCTTCGTAG                                        |
| 608                                                                                    | ATGACTATTCATGAATTTTCATTTTC                                        |
| 609                                                                                    | TCAATCATAGTTTTTCGATACAT                                           |

**Amplification and screening primers for a mutant at the *Tanf\_01295* locus**

|                  |                                                                |
|------------------|----------------------------------------------------------------|
| 588              | CGGAAAGCTGGGCTATTTCAAG                                         |
| 589              | <b>CGGGCAATTTCTTTTTTGTCATCTTCTGCGGTACTTTTCCGTATTG</b>          |
| 590              | <b>CCCTGAAAAATTCATCCTTCGTAGGATGAAGATACTCCTGCTCAGTACGTTTGAG</b> |
| 591              | TTATCTTCCATCGAAGGAATAAC                                        |
| 460 <sup>a</sup> | ATGACAAAAAAGAAATTGCCCGTTCGTTTTAC                               |
| 461 <sup>a</sup> | CTACGAAGGATGAAATTTTTCAGGGACAAC                                 |
| 592              | TTGACCGGAGTATTCTCAAAC                                          |
| 593              | TTCTGCCACATACCCGTTCTG                                          |
| 524 <sup>a</sup> | GTAAAACGAACGGGCAATTTCTTTTTTGTCAT                               |
| 525 <sup>a</sup> | CCCTGAAAAATTCATCCTTCGTAG                                       |
| 610              | ATGTTTTTTGACCGTTTTCTTCCCAAAG                                   |
| 611              | TTATTTTCTCGCTGCAATCACAATATAG                                   |

---

<sup>a</sup>(Tomek et al., 2017)



**Supplementary TABLE S5** | Locus tags for S-layer genes of *T. forsythia* strains and isolate *Tannerella* sp. BU063.

| <b>Strain</b>     | <i>tfsA</i><br><i>locus tag</i><br>GenBank accession | <i>tfsB</i><br><i>locus tag</i><br>GenBank accession |
|-------------------|------------------------------------------------------|------------------------------------------------------|
| <b>ATCC 43037</b> | <i>Tanf_03370</i><br>KKY61889.1                      | <i>Tanf_03375</i><br>KKY61890.1                      |
| <b>UB20</b>       | <i>TFUB20_01413</i><br>SCQ21558.1                    | <i>TFUB20_01414</i><br>SCQ21562.1                    |
| <b>FDC 92A2</b>   | <i>BFO_1650-1 (TF2661-2)</i><br>AAR82922             | <i>BFO_1652 (TF2663)</i><br>AEW21150                 |
| <b>UB4</b>        | <i>TFUB4_01362</i><br>SCQ20752.1                     | <i>TFUB4_01363</i><br>SCQ20755.1                     |
| <b>KS16</b>       | <i>TFKS16_1455</i><br>BAR51709.1                     | <i>TFKS16_1457</i><br>BAR51711.1                     |
| <b>UB22</b>       | <i>TFUB22_01373</i><br>SCQ22347.1                    | <i>TFUB22_01374</i><br>SCQ22351.1                    |
| <b>3313</b>       | <i>TF3313_1507</i><br>BAR49026.1                     | <i>TF3313_1509</i><br>BAR49028.1                     |
| <b>BU063</b>      | <i>BCB71_00675</i><br>AOH39800.1                     | <i>BCB71_00680</i><br>AOH39801.1                     |

### Supplementary References

- Friedrich, V., Janesch, B., Windwarder, M., Maresch, D., Braun, M.L., Megson, Z.A., Vinogradov, E., Goneau, M.F., Sharma, A., Altmann, F., Messner, P., Schoenhofen, I.C., and Schäffer, C. (2017). *Tannerella forsythia* strains display different cell-surface nonulosonic acids: biosynthetic pathway characterization and first insight into biological implications. *Glycobiology* 27, 342-357. doi: 10.1093/glycob/cww129
- Grünwald-Gruber, C., Thader, A., Maresch, D., Dalik, T., and Altmann, F. (2017). Determination of true ratios of different *N*-glycan structures in electrospray ionization mass spectrometry. *Anal. Bioanalyt. Chem.* 409, 2519-2530. doi: 10.1007/s00216-017-0235-8
- Tomek, M.B., Janesch, B., Maresch, D., Windwarder, M., Altmann, F., Messner, P., and Schäffer, C. (2017). A pseudaminic acid or a legionaminic acid derivative transferase is strain-specifically implicated in the general protein *O*-glycosylation system of the periodontal pathogen *Tannerella forsythia*. *Glycobiology* 27, 555-567. doi: 10.1093/glycob/cwx019
